# Supplementary material for: Effectiveness of Stimulant Medications on Disruptive Behavior and Mood Problems in Young Children
Source: PubMed Central journal article supplement — Clin Psychopharmacol Neurosci. 2020 Aug 31;18(3):402–11. doi: 10.9758/cpn.2020.18.3.402 (PMC7383001; doi:10.9758/cpn.2020.18.3.402), 2020-08-31
Supplement: CPN-18-402_Supple.pdf [file CPN-18-402_Supple.pdf]

## **Supplemental Material**

To address the potential confounding factor of multiple psychotropic medications in addition to the stimulant medication status, we conducted analyses of ANCOVA same as the main analyses, excluding the participants who received multiple psychotropic medications in addition to the stimulant medications. This revealed:

1. Replicating the main analysis, there was no significant difference of age, gender, ethnicity, and baseline CBCL scores of Attention Problems, Aggressive Behavior, Externalizing Problems, ADHD-DSM, ODD-DSM, CD-DSM, and Irritability: see Supplementary Table 2.
2. Replicating the main analysis, there was significant improvement in all of the CBCL scores after the completion of the treatment program; see Supplementary Table 3.
3. Replicating the main analysis, there was no significant main effect of stimulant medication status (on stimulant medication vs. no stimulant medication), or interaction between time (pre-treatment program enrollment vs. post-treatment program enrollment) and stimulant medication status on any of the CBCL scores; see Supplementary Table 4.

**Supplementary Table 1.** Summary of psychotropic medications prescribed to participants

|                                                                 | Number of patients | Mean daily dosage in milligrams | Range of daily dosage in milligrams |
|-----------------------------------------------------------------|--------------------|---------------------------------|-------------------------------------|
| <b>Stimulant medication</b>                                     |                    |                                 |                                     |
| Dexmethylphenidate                                              | 11                 | 18.6                            | 5–45                                |
| Lisdexamfetamine                                                | 4                  | 27.5                            | 20–40                               |
| Methylphenidate                                                 | 11                 | 34.7                            | 5–63                                |
| Amphetamine salts                                               | 9                  | 16.4                            | 2.5–25                              |
| <b>Non-stimulant medications</b>                                |                    |                                 |                                     |
| Alpha-agonists (guanfacine and clonidine)                       | 16                 |                                 |                                     |
| Atomoxetine                                                     | 2                  |                                 |                                     |
| Atypical antipsychotics (Risperidone and Aripiprazole)          | 10                 |                                 |                                     |
| Mood stabilizers (Oxcarbazepine, Valproic Acid, and Topiramate) | 3                  |                                 |                                     |
| Antidepressants (Fluoxetine and Sertraline)                     | 4                  |                                 |                                     |

  

| Changes of the medications (excluded) | At the beginning of the treatment program enrollment | At the completion of the treatment program enrollment |
|---------------------------------------|------------------------------------------------------|-------------------------------------------------------|
| Participant 1                         | Methylphenidate XR 25 mg                             | Methylphenidate XR 25 mg and Clonidine 0.1 mg         |
| Participant 2                         | Methylphenidate 15 mg                                | Lisdexamfetamine XR 30 mg and Sertraline 25 mg        |
| Participant 3                         | Dextroamphetamine XR 10 mg                           | Dextroamphetamine XR 10 mg and Risperidone 0.5 mg     |
| Participant 4                         | None                                                 | Dextroamphetamine XR 5 mg                             |
| Participant 5                         | None                                                 | Methylphenidate XR 10 mg                              |
| Participant 6                         | None                                                 | Methylphenidate XR 10 mg                              |

**Supplementary Table 2.** Characteristics of the participants without multiple psychotropic medications

| Variables                       | Total patients<br>(n = 73) | On stimulants<br>(n = 14) | No stimulant<br>medication (n = 59) | <i>p</i> value |
|---------------------------------|----------------------------|---------------------------|-------------------------------------|----------------|
| Age                             | 6.4 ± 2.0                  | 5.8 ± 1.9                 | 6.6 ± 2.0                           | 0.17           |
| Sex, male/female                | 60 (82.2)/13 (17.8)        | 12 (85.7)/2 (14.3)        | 48 (81.3)/11 (18.6)                 | 0.18           |
| Race/ethnicity, white/non-white | 47 (64.4)/26 (35.6)        | 9 (64.3)/5 (35.7)         | 38 (64.4)/21 (35.6)                 | 0.97           |
| Treatment duration              | 159.9 ± 107.9              | 165.0 ± 78.4              | 158.6 ± 114.4                       | 0.84           |
| CBCL score profiles             |                            |                           |                                     |                |
| Attentional problems            | 64.7 ± 8.4                 | 65.7 ± 6.8                | 64.3 ± 9.0                          | 0.59           |
| Aggressive behavior             | 73.2 ± 13.1                | 75.7 ± 12.3               | 72.5 ± 13.7                         | 0.43           |
| Externalizing problems          | 70.5 ± 10.5                | 72.2 ± 8.7                | 69.8 ± 11.2                         | 0.46           |
| ADHD-DSM                        | 64.8 ± 8.6                 | 66.3 ± 7.5                | 64.4 ± 9.1                          | 0.48           |
| ODD-DSM                         | 70.4 ± 8.3                 | 71.7 ± 6.0                | 70.0 ± 9.1                          | 0.51           |
| Irritability                    | 4.4 ± 1.6                  | 4.2 ± 1.9                 | 4.5 ± 1.5                           | 0.58           |
| CD-DSM                          | 73.5 ± 8.4 (n = 31)        | 72.3 ± 6.6 (n = 7)        | 73.8 ± 8.9 (n = 24)                 | 0.68           |

Values are presented as mean ± standard deviation or number (%).

CBCL, Child Behavior Checklist; ADHD, Attention-Deficit/Hyperactivity Disorder; ODD, Oppositional Defiant Disorder; CD, Conduct Disorder; DSM, Diagnostic and Statistical Manual of Mental Disorders.

**Supplementary Table 3.** Pre- and post-intervention (treatment program enrollment) paired *t* test results for main outcomes of interest for the participants without multiple psychotropic medications

| Variables              | Pre-intervention | Post-intervention | Paired <i>t</i> value | <i>p</i> value |
|------------------------|------------------|-------------------|-----------------------|----------------|
| Attentional problems   | 64.7 ± 8.4       | 61.3 ± 7.9        | 4.6                   | < 0.001        |
| Aggressive behavior    | 73.2 ± 13.1      | 63.8 ± 10.4       | 8.5                   | < 0.001        |
| Externalizing problems | 70.5 ± 10.5      | 62.0 ± 10.7       | 9.9                   | < 0.001        |
| ADHD-DSM               | 64.8 ± 8.6       | 61.0 ± 8.3        | 4.6                   | < 0.001        |
| ODD-DSM                | 70.4 ± 8.3       | 61.7 ± 8.9        | 9.4                   | < 0.001        |
| Irritability           | 4.4 ± 1.6        | 3.1 ± 1.9         | 6.6                   | < 0.001        |
| CD-DSM (n = 51)        | 73.5 ± 8.4       | 64.9 ± 7.8        | 6.3                   | < 0.001        |

Values are presented as mean ± standard deviation.

ADHD, Attention-Deficit/Hyperactivity Disorder; ODD, Oppositional Defiant Disorder; CD, Conduct Disorder; DSM, Diagnostic and Statistical Manual of Mental Disorders.

**Supplementary Table 4.** Time (pre vs. post-program) by stimulant medication status (on stimulant vs. no stimulant medication) ANVOCA results for the participants without multiple psychotropic medications

| Variables              | Time by stimulant medication status interaction |                | Main effect of time |                | Main effect of stimulant medication status |                |
|------------------------|-------------------------------------------------|----------------|---------------------|----------------|--------------------------------------------|----------------|
|                        | F value                                         | <i>p</i> value | F value             | <i>p</i> value | F value                                    | <i>p</i> value |
| Attentional problems   | 0.31                                            | 0.58           | 0.50                | 0.48           | 0.22                                       | 0.65           |
| Aggressive behavior    | 1.10                                            | 0.31           | 2.93                | 0.09           | 0.25                                       | 0.62           |
| Externalizing problems | 0.59                                            | 0.45           | 1.69                | 0.20           | 0.08                                       | 0.79           |
| ADHD-DSM               | 0.48                                            | 0.49           | 2.87                | 0.10           | 0.66                                       | 0.42           |
| ODD-DSM                | 0.57                                            | 0.45           | 2.10                | 0.15           | 0.01                                       | 0.92           |
| Irritability           | 0.13                                            | 0.72           | 1.01                | 0.32           | 0.14                                       | 0.71           |
| CD-DSM (n = 31)        | 4.16                                            | 0.032*         | 0.04                | 0.84           | 0.64                                       | 0.32           |

ADHD, Attention-Deficit/Hyperactivity Disorder; ODD, Oppositional Defiant Disorder; CD, Conduct Disorder; DSM, Diagnostic and Statistical Manual of Mental Disorders.

\**p* < 0.05.

**Supplementary Table 5.** Skewness and Kurtosis of the symptom profiles

| CBCL score             | Total patients (n = 97) | On stimulants (n = 28) | No stimulant medication (n = 69) |
|------------------------|-------------------------|------------------------|----------------------------------|
| Attentional problems   | 0.151                   | 0.319                  | 0.119                            |
| Aggressive behavior    | 0.036                   | 0.072                  | 0.014                            |
| Externalizing problems | -0.515                  | -0.769                 | -0.467                           |
| ADHD-DSM               | -0.243                  | -0.393                 | -0.186                           |
| ODD-DSM                | -0.729                  | -0.847                 | -0.741                           |
| Irritability           | -0.858                  | -0.844                 | -0.812                           |
| CD-DSM                 | -0.070 (n = 51)         | 0.147 (n = 19)         | -0.213 (n = 32)                  |

CBCL, Child Behavior Checklist; ADHD, Attention-Deficit/Hyperactivity Disorder; ODD, Oppositional Defiant Disorder; CD, Conduct Disorder; DSM, Diagnostic and Statistical Manual of Mental Disorders.

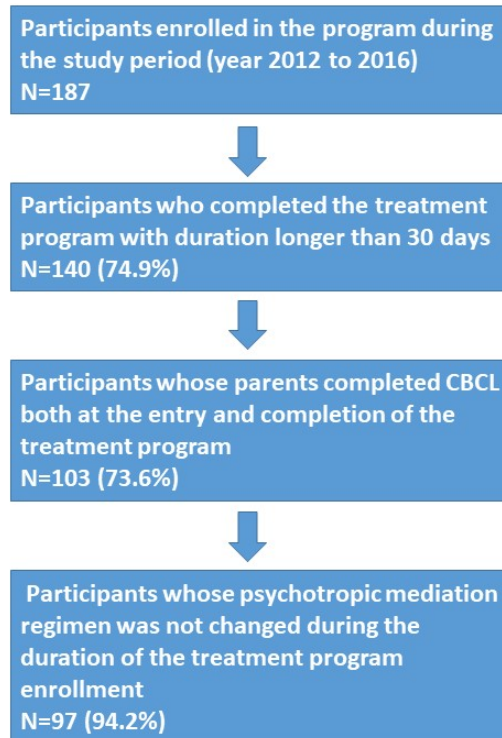

**Supplementary Fig. 1.** Data screening process for chart review. CBCL, Child Behavior Checklist.
